# Supplementary material for: Ovarian control of growth and sexual size dimorphism in a male-larger gecko
Source: Oxford University Press journal article supplement (doi:10.1242/jeb.146597), 2016-01-01
Supplement: jeb146597supp.pdf [file jeb146597supp.pdf]

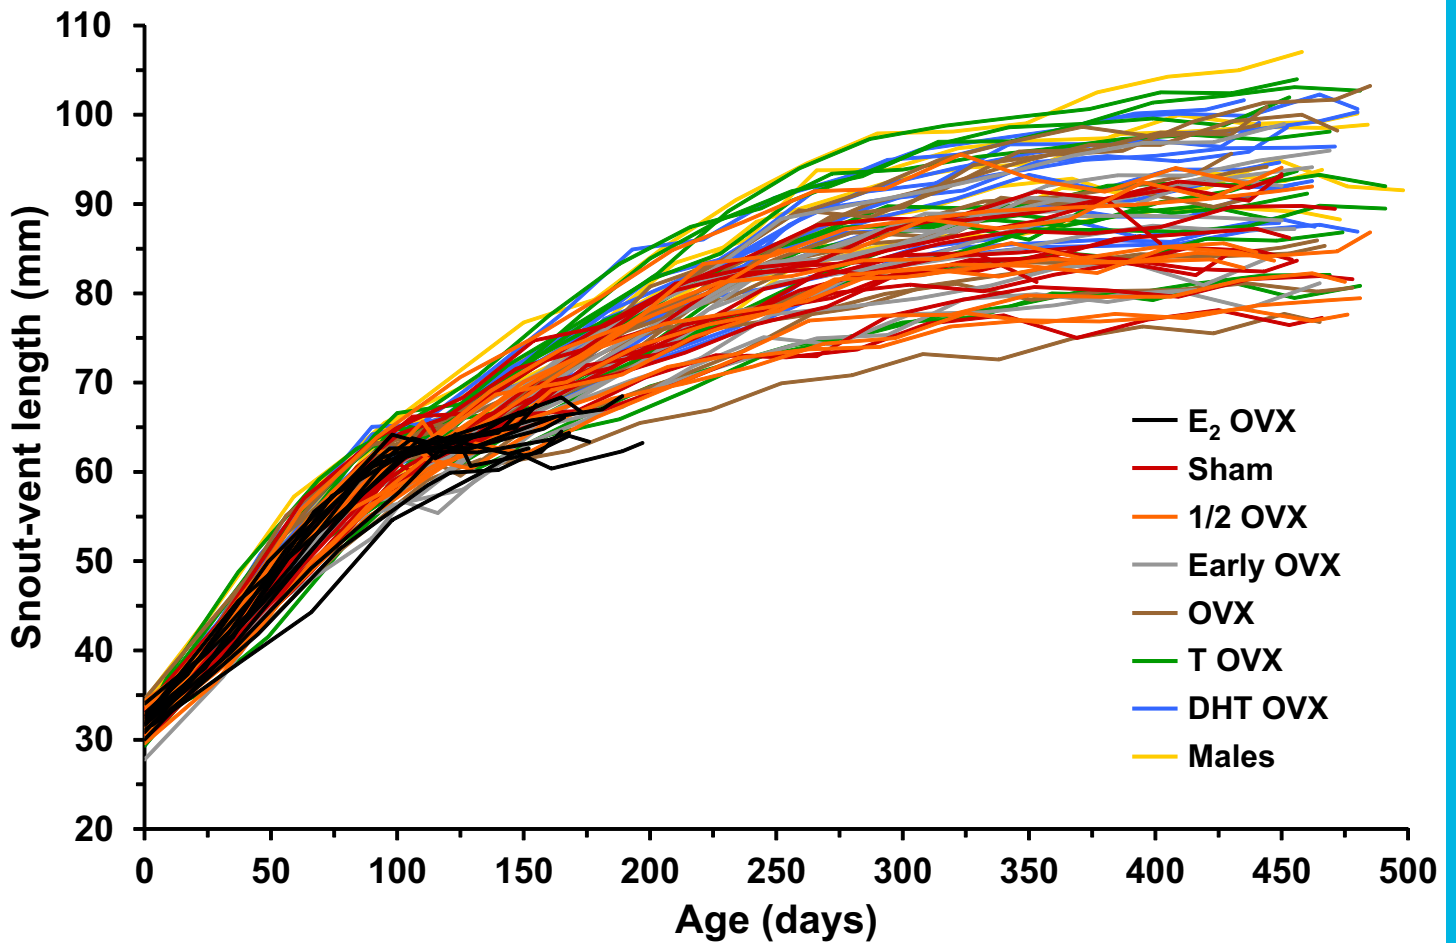

**Fig. S1.** Growth trajectory (snout-vent length increment) of each experimental animal during the whole experiment. Experimental group abbreviations: E<sub>2</sub> OVX, ovariectomized females treated with estradiol; Sham, sham-operated reproducing females; 1/2 OVX, unilaterally ovariectomized reproducing females; Early OVX, early ovariectomized females; OVX, ovariectomized females; T OVX, ovariectomized females treated with testosterone; DHT OVX, ovariectomized females treated with dihydrotestosterone; Males, Intact males.

**Table S1.** Summary statistic for snout-vent length and body mass in all treatment groups at the time of hatching.

| <b>Treatment group</b>     | <b>N</b> | <b>Snout-vent length (mm)</b>     | <b>Body mass (g)</b>                     |
|----------------------------|----------|-----------------------------------|------------------------------------------|
|                            |          | <b>Median,<br/>quartile range</b> | <b>Mean,<br/>95% confidence interval</b> |
| E <sub>2</sub> OVX females | 12       | 31.75, 31.34 - 32.46              | 0.79, 0.72 - 0.87                        |
| Sham females               | 12       | 32.46, 31.18 - 33.31              | 0.77, 0.70 - 0.84                        |
| 1/2 OVX females            | 10       | 31.96, 31.19 - 33.50              | 0.77, 0.66 - 0.88                        |
| Early OVX females          | 10       | 32.76, 31.12 - 33.42              | 0.84, 0.74 - 0.94                        |
| OVX females                | 11       | 33.01, 32.46 - 33.53              | 0.86, 0.81 - 0.90                        |
| T OVX females              | 12       | 32.21, 31.86 - 33.13              | 0.77, 0.71 - 0.83                        |
| DHT OVX females            | 12       | 32.61, 31.92 - 33.13              | 0.80, 0.73 - 0.88                        |
| Intact males               | 6        | 33.26, 31.51 - 34.43              | 0.81, 0.67 - 0.94                        |

Experimental group abbreviations:

|                            |                                                         |
|----------------------------|---------------------------------------------------------|
| E <sub>2</sub> OVX females | ovariectomized females treated with estradiol           |
| Sham females               | sham-operated reproducing females                       |
| 1/2 OVX females            | unilaterally ovariectomized reproducing females         |
| Early OVX females          | early ovariectomized females                            |
| OVX females                | ovariectomized females                                  |
| T OVX females              | ovariectomized females treated with testosterone        |
| DHT OVX females            | ovariectomized females treated with dihydrotestosterone |

**Table S2.** Summary statistic for age, snout-vent length and body mass of female treatment groups at the time of surgery.

| <b>Treatment group</b>     | <b>N</b> | <b>Age (days)</b><br><b>Median,</b><br><b>quartile range</b> | <b>Snout-vent length (mm)</b><br><b>Median,</b><br><b>quartile range</b> | <b>Body mass (g)</b><br><b>Median,</b><br><b>quartile range</b> |
|----------------------------|----------|--------------------------------------------------------------|--------------------------------------------------------------------------|-----------------------------------------------------------------|
| E <sub>2</sub> OVX females | 12       | 106, 98 - 115                                                | 62.39, 61.47 - 63.62                                                     | 5.33, 5.19 - 5.46                                               |
| Sham females               | 12       | 108, 103 - 115                                               | 63.10, 62.26 - 64.16                                                     | 5.33, 5.29 - 5.47                                               |
| 1/2 OVX females            | 10       | 108, 96 - 115                                                | 62.55, 61.50 - 63.24                                                     | 5.38, 5.14 - 5.46                                               |
| Early OVX females          | 10       | 78, 76 - 90                                                  | 55.30, 54.65 - 56.02                                                     | 3.45, 3.25 - 3.59                                               |
| OVX females                | 11       | 100, 98 - 110                                                | 63.04, 61.37 - 63.7                                                      | 5.43, 5.17 - 5.52                                               |
| T OVX females              | 12       | 105, 94 - 109                                                | 62.71, 62.14 - 63.99                                                     | 5.47, 5.33 - 5.55                                               |
| DHT OVX females            | 12       | 102, 93 - 107                                                | 64.09, 62.79 - 64.26                                                     | 5.34, 5.17 - 5.53                                               |

Experimental group abbreviations:

|                            |                                                         |
|----------------------------|---------------------------------------------------------|
| E <sub>2</sub> OVX females | ovariectomized females treated with estradiol           |
| Sham females               | sham-operated reproducing females                       |
| 1/2 OVX females            | unilaterally ovariectomized reproducing females         |
| Early OVX females          | early ovariectomized females                            |
| OVX females                | ovariectomized females                                  |
| T OVX females              | ovariectomized females treated with testosterone        |
| DHT OVX females            | ovariectomized females treated with dihydrotestosterone |
